# Supplementary material
Source: PubMed Central journal article supplement (PMC4366463)

**Figure 1**

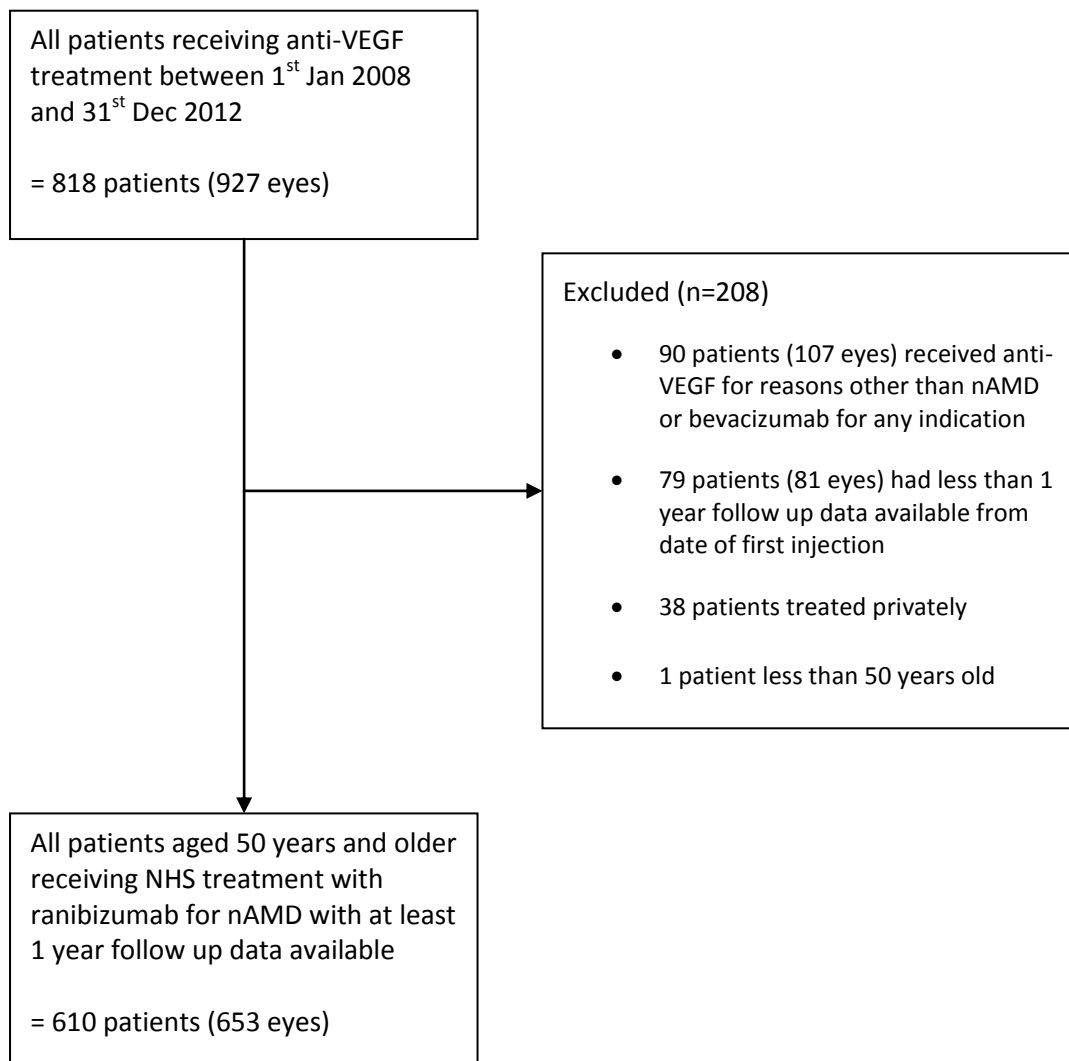

Supplement: eye2014296x1.pdf [file eye2014296x1.pdf]
